1 Reasons for mosquito net non-use in malaria-endemic countries: A review of qualitative  
2 research published between 2011 and 2021.

3

4 Hadiza Isa Ladu<sup>1,2</sup>, Umar Shuaibu<sup>3</sup> and Justin Pulford<sup>1</sup>.

5

6 <sup>1</sup>Liverpool School of Tropical Medicine, Pembroke Place, Liverpool. L3 5QA, United Kingdom.

7 <sup>2</sup>University of Maiduguri Teaching Hospital, Maiduguri, Borno State, Nigeria

8 <sup>3</sup>Aminu Kano Teaching Hospital, Kano, Kano State, Nigeria.

9

10 Corresponding author: [Justin.Pulford@lstm.ac.uk](mailto:Justin.Pulford@lstm.ac.uk).

11

12

13

14

15

16

17

18

19

20

21

22 **ABSTRACT**

23

24 Mosquito nets, particularly insecticide-treated nets [ITNs], are the most recommended method of  
25 malaria control in endemic countries. However, many individuals do not use them as advised. The  
26 current paper expands on a previous review published in 2011 which highlighted a need for more  
27 qualitative research on the reasons for mosquito net non-use. We present a systematic review of  
28 qualitative research published in the past decade to assess the growth and quality of qualitative  
29 papers about net non-use and examine and update the current understanding.

30 A comprehensive literature search was carried out in MEDLINE, CINAHL, and Global Health, in  
31 addition to a citation search of the initial review. Relevant papers were screened and discussed.

32 The critical appraisal assessment tool was used to ensure quality. Thematic synthesis was used  
33 to extract, synthesise, and analyse study findings.

34 Compared to the initial review, the results showed a ten-fold increase in qualitative research on  
35 the reasons for mosquito net non-use between 2011 and 2021. In addition, the quality of the  
36 research has improved, with more than 90% of the papers receiving high scores, using the critical  
37 appraisal assessment tool. The reported reasons for non-use were categorised into four themes  
38 Human factors, Net factors, Environmental/Lifestyle factors, and Administrative/Economic factors.  
39 More than two-thirds of the studies were carried out in Africa, with lead African researchers in  
40 African institutions.

41 Despite the distribution of free mosquito nets in malaria-endemic countries, new challenges to  
42 their use continue to emerge. The most common reasons for net non-use across all regions of  
43 Malaria endemic countries were discomfort and perceived ineffectiveness of nets. Technical  
44 challenges and improper net use dominated East and South African regions, signifying the need  
45 for dedicated and region-specific measures and strategies to ensure the continued usage of  
46 mosquito nets, particularly ITNs.

47

48 **Keywords:** Malaria, Mosquito nets, ITN, Endemic countries, Non-use, Review.

49

## 50 INTRODUCTION

51  
52 There were an estimated 247 million malaria cases across 84 malaria-endemic countries [MECs]  
53 in 2021, with more than 90% of the cases recorded in Sub-Saharan Africa . The mortality rate  
54 ranges between 0.3 – 2.2% and can be as high as 11-30% for severe malaria (1). Malaria infection  
55 may further affect an individual's social and economic life. Many individuals in MEC are poor;  
56 thus, infection with the disease increases their financial burden through drug procurement and  
57 travel expenses to health centers or clinics. Other economic costs from the illness include loss of  
58 wages due to absence from work, and frequent infection can also impact the learning of children  
59 who miss school (2).

60  
61 Malaria can be prevented and controlled in MEC through the routine use of mosquito nets (2, 3).  
62 There are two kinds of mosquito nets: insecticide-treated nets [ITNs], an "umbrella" term  
63 encompassing "all nets treated with an insecticide, insect growth regulator and or synergist" (4),  
64 and untreated mosquito nets. An untreated net protects the individual/s resting within against  
65 mosquito and other pest/insect bites (5, 6). While ITNs offer personal protection to those under  
66 the net and kill mosquitoes conferring a more comprehensive household/community benefit (7).  
67 An estimated 1.2 billion cases of malaria and 7.1 million deaths were averted between 2004 and  
68 2019 in sub-Saharan Africa following antimalaria campaigns, with ITNs making the single most  
69 significant contribution accounting for an estimated 68% of these figures (8).

70  
71 The cumulative shipments of all forms of mosquito nets to MEC increased from 436 million in  
72 2010 to approximately 2.6 billion in 2021 (9). While access to ITNs may have improved in MEC  
73 over this time, this does not imply increased use, defined as "the proportion of the population that  
74 does sleep under a net" (8). For example, at least 72% of Sub-Saharan African households had  
75 at least one ITN in 2018; however, only 50% of the population at risk slept under an ITN the night  
76 before (10) despite WHO guidelines recommending continuous use of ITN nightly in Malaria  
77 endemic areas irrespective of climatic conditions (4). Nevertheless, ITN remains a cost-effective  
78 strategy for controlling and preventing malaria (11) and global support remains to increase ITN  
79 access and use in MEC, particularly in sub-Saharan Africa (2).

80  
81 A previous review by Pulford et al. (12) examined reasons for net non-use as reported in the  
82 published literature. This review identified discomfort due to heat and perceived low density of  
83 mosquitoes as the primary reasons for net non-use (12), although Pulford et al. (12) concluded  
84 that more and better quality research examining reasons for ITN non-use was needed and  
85 especially qualitative studies. In the decade that has passed since the publication of this review,  
86 a wide range of research [inclusive of qualitative research] has been completed, and a more  
87 complex understanding of reasons for ITN non-use appears to be emerging. For instance, Perkins  
88 et al.(13) noted that people frequently imitate other people's bed-net usage behaviour and  
89 Guglielmo et al.(14) draw on qualitative findings to challenge how 'use' and 'compliance' are even  
90 evaluated in the context of ITN use for malaria control. However, the more recent research effort's  
91 scope, quality, and findings have yet to be reviewed.

92  
93 In this paper, we present an up to date review of published qualitative research exploring  
94 mosquito net non-use conducted in the decade since the original review by Pulford et al. (12).  
95 Our specific objectives were to assess the extent and quality of qualitative research published  
96 between 2011-2021 and, drawing on the findings from this literature, update current  
97 understanding of reasons for mosquito net non-use in MEC. It is hoped the results may inform  
98 the design and selection of net-use promoting interventions.

99

100 **METHODOLOGY**

101  
102 We conducted a structured literature review of qualitative studies published between 2011 – 2021  
103 which examined reasons for mosquito net non-use in MEC.

104  
105 **Search strategy**

106 A structured electronic search of peer-reviewed articles was conducted using the following three  
107 databases: MEDLINE, CINAHL, and Global health. An additional citation search of the original  
108 Pulford et al. review (12) was conducted to identify and retrieve relevant papers. The search terms  
109 used in the original Pulford et al. review (12) were adapted and applied as a baseline for the  
110 current study: [1] Malaria AND [2] Mosquito Bed Net AND [3] Non-use AND [4] Qualitative, with  
111 variants of the terms [Table1].

112  
113  
114 *Table 1: Original reviews search terms, adjusted for year and study type.*

| Search ID# | MeSH terms.                                                                                                                                                   |
|------------|---------------------------------------------------------------------------------------------------------------------------------------------------------------|
| S8         | S7 AND S6                                                                                                                                                     |
| S7         | “qualitative*” OR “focus*group” OR “interview*” OR “mixed method”                                                                                             |
| S6         | S4 AND S5                                                                                                                                                     |
| S5         | “non-use*” OR “obstacle*” OR “misuse*” OR “disuse*” OR “challenge*” OR “neglect*” OR “abandon*” OR “barrier*” OR “use*”                                       |
| S4         | S2 AND S3                                                                                                                                                     |
| S3         | “Mosquito Bed Net*” OR “Mosquito Net*”<br>OR “Mosquito Bednet*” OR “Insecticid*treated” OR “ITN*” OR “LLIN*”<br>OR “Insecticide-treated Bednets” OR “Bednet*” |
| S2         | “Malaria*”[201-2021]                                                                                                                                          |
| S1         | “Malaria*”                                                                                                                                                    |

115  
116  
117 **Study selection**  
118 All retrieved publications were imported into Endnote, and duplicates removed. Publications were  
119 initially screened by title and abstract against specified inclusion criteria, with the remaining  
120 publications subject to full-text review. All publications were independently reviewed for inclusion  
121 at both stages by two authors [HIL, US], with any disagreements resolved by discussion until  
122 consensus was reached. The inclusion criteria included studies: conducted in MEC, research  
123 focused on mosquito net non-use [as either primary or secondary objective], published in English  
124 between 2011 and 2021, employed qualitative methods or a mixed method study design with  
125 transparent reporting on qualitative methods and results.

126

127 **Quality appraisal**

128 The Critical appraisal skill programme [CASP] checklist was utilised to assess the quality of the  
129 retrieved papers. CASP consists of ten structured questions that cover the following topics: study  
130 purpose, appropriateness of qualitative design, suitability of study design, sampling strategy, data  
131 collection method, ethical consideration, data analysis, findings, and study relevance [see Table  
132 3]. Each set of questions has three scoring options: Yes (1), No (0), or Can't tell (0). Each set of  
133 questions has hints to guide the researcher in evaluating papers. Studies with a cumulative score  
134 of eight and above were regarded as high quality, five to seven as medium quality, and below five  
135 as low-quality studies (15, 16). Two authors independently assessed all publications against the  
136 CASP criteria [HIL, US]. An agreement was reached between both authors on the CASP scoring  
137 for each paper.

138

139 **Data extraction and analysis**

140 The lead researcher extracted the following information into an Excel file from each paper;  
141 Research title, authors [ 1<sup>st</sup> and last], institution of lead author, year of publication, study  
142 objectives, study settings, country of focus, study participants, study type [qualitative alone or  
143 mixed study] and Information on data collection tools, analysis, and sampling methods. Finally, a  
144 summarised version of the key findings reported within each paper concerning reasons for ITN  
145 non-use was extracted.

146

147 Summarised versions of the key findings were analysed thematically. The first step was to  
148 become acquainted with the data. This entailed reading the extracted data repeatedly, identifying  
149 common themes pertinent to our study objectives, and highlighting related quotes that emphasise  
150 and elaborate on the themes. Subsequently, a coding framework was developed. The key  
151 findings data were then systematically coded against this framework and a final set of themes  
152 and associated sub-themes identified. All other extracted data were analysed using descriptive  
153 statistics as presented in the results section below.

154

155 **RESULTS**

156

157 **Study selection**

158 As depicted in Fig. 1( Attached file) the initial search yielded 892 articles, of which 81 met the  
159 inclusion criteria for a full-text review. Following full-text review, 39 articles were included in the  
160 final sample

161

162 **Characteristics of included papers.**

163 Cumulatively, the 39 papers pertained to 19 MEC, with most [n=34] studies conducted in Africa  
164 [Table 2]. The remaining five studies were from Southeast Asia. Most publications (19/39) were  
165 led by authors affiliated with institutions in MEC, including nineteen from African institutions.

166

167

168

169

170

171

172

173

174

175

176 *Table 2: Geographical distribution of selected studies.*

| Region         | Country            | No. of studies | Total No. of studies |
|----------------|--------------------|----------------|----------------------|
| Asia           | Bangladesh         | 1              | 5                    |
|                | Myanmar            | 2              |                      |
|                | Papua New Guinea   | 1              |                      |
|                | Thailand           | 1              |                      |
| Central Africa | DRC                | 1              | 1                    |
| East Africa    | Ethiopia           | 6              | 18                   |
|                | Kenya              | 1              |                      |
|                | Madagascar         | 1              |                      |
|                | Rwanda             | 1              |                      |
|                | Tanzania           | 4              |                      |
|                | Uganda             | 5              |                      |
| West Africa    | Benin              | 1              | 11                   |
|                | Burkina Faso       | 1              |                      |
|                | Ghana              | 4              |                      |
|                | Nigeria            | 4              |                      |
|                | Senegal            | 1              |                      |
| South Africa   | Malawi             | 1              | 2                    |
|                | Zimbabwe           | 1              |                      |
| Multi-country  | Ghana/Malawi/Kenya | 1              | 2                    |
|                | Mali/Kenya         | 1              |                      |

177  
178  
179  
180  
181  
182  
183  
184  
185  
186  
187

A full description of the study characteristics of publications included in this review can be found in supplementary file one. As shown, over two-thirds [34] of the study populations were drawn from rural settings. Most studies reviewed [ 25/39] employed a qualitative study design alone, compared to a third [14/39] that used a mixed methods study design. Data collection methods variously included focus group discussions, key informant interviews, in-depth interviews, observation, and participatory activities. Sampling methods included snowballing, and convenient selection, although the majority used purposive sampling [20/39] to recruit study participants. More than two-thirds of studies [30] utilised thematic analysis.

188 **Quality assessment.**

189  
190  
191  
192  
193  
194  
195  
196  
197  
198

Table 3 provides a summary of the quality assessment outcome. A CASP score of at least eight, considered to be high, was present in about 90% [35/39] of reviewed studies. The remaining 10% [4/39] received a score of six and seven, considered medium quality. No studies scored below five, and no publications were disregarded for this review based on the CASP score. As shown in Table 3, all studies [39/39] made clear their aims and objectives, and the majority clearly stated the suitability of their choice of a qualitative study design [38/39]. The recruitment strategy and data collection methods were appropriate in almost all reviewed papers [38/39 and 37/39, respectively]. Regarding reflexivity, nine studies provided details on how they evaluated their role, potential bias, influence during data collection, and how they reacted to events and any changes during the study. Even though 28 of the studies did not provide information on reflexivity, they did

199 provide information on how they established relationships with study participants before the start  
200 of each survey. Almost all studies [38/39] indicated how ethical approval was obtained. In addition,  
201 most of the studies' data analyses [28/39] were sufficiently thorough, and their findings [37/39]  
202 were clear and concise.

203  
204  
205

Table 3: Quality assessment results.

206

| Criteria                                                                             | [Yes] | [Can't tell] | [No] |
|--------------------------------------------------------------------------------------|-------|--------------|------|
| Was there a clear statement of the aims of the research?                             | 39    | 0            | 0    |
| Is a qualitative methodology appropriate?                                            | 39    | 0            | 0    |
| Was the research design appropriate to address the aim of the research?              | 38    | 0            | 1    |
| Was the recruitment strategy appropriate to the aim of the research?                 | 38    | 1            | 0    |
| Was the data collected in a way that addresses the research issues?                  | 37    | 0            | 2    |
| Has the relationship between researcher and participants been adequately considered? | 9     | 2            | 28   |
| Have ethical issues been taken into consideration?                                   | 38    | 0            | 1    |
| Was the data analysis sufficiently rigorous?                                         | 28    | 0            | 11   |
| Is there a clear statement of findings?                                              | 37    | 1            | 1    |
| How valuable is the research?                                                        | 39    | 0            | 0    |

207  
208  
209

210

211

212

213

214

215

216

217

218

219

220

221

222

223

224

225

### Thematic analysis of key findings.

226 Reported reasons for net non-use across the 39 publications included in the review were  
227 subsequently categorised under four main themes, each with two or more sub-themes. Each  
228 theme and sub-theme is presented in turn below, alongside relevant quotes taken from reviewed  
229 publications to illustrate key points. Supplementary file 2 lists the respective publications coded  
230 against each sub-theme.

231

232

233

234

235

236

237

238

239

240

241

242

243

244

245

246

247

248

249 Table 4: Summary of emerging themes.

| Analytical/<br>final theme            | Sub-theme                      | Descriptive theme                                                                                          |
|---------------------------------------|--------------------------------|------------------------------------------------------------------------------------------------------------|
| Human factor                          | Perceived effectiveness        | In-effectiveness of nets<br>Attitudes to net use<br>Preference for other preventive methods<br>Net hygiene |
|                                       | Discomfort                     | Adverse effect of insecticides<br>Hot climate                                                              |
|                                       | Seasonality of Mosquito        | Perceived low density of mosquito                                                                          |
|                                       | Prioritizing nets              | Sleeping arrangement                                                                                       |
|                                       | Alternate net use              | Domestic use of net                                                                                        |
|                                       | Socio-cultural practices       | Social gatherings                                                                                          |
| Net factor                            | Net preference                 | Characteristics of nets<br>Improper use of net                                                             |
|                                       | Net set up                     | Challenges with Net placement                                                                              |
| Environmental/<br>lifestyle factor    | Architecture of home           | Home structure                                                                                             |
|                                       | Travel or nocturnal activities | Net use away from home                                                                                     |
| Administrative/<br>economic<br>factor | Access to nets                 | Net distribution                                                                                           |
|                                       | Economic implications          | New net purchase<br>Net exchange for money                                                                 |

250  
251  
252  
253  
254  
255  
256  
257  
258  
259  
260  
261  
262  
263  
264  
265  
266  
267  
268  
269

Human factors

This theme refers to reasons for non-use that pertain to human perceptions, preferences or experiences. More than two-thirds of study findings were categorised under this theme, across the following six sub-themes:

Perceived effectiveness

Results suggest that participants do not always consider ITNs to be effective or considered other preventive methods to be more effective. For example, the absence of dead insects at the side of the mosquito nets gave some participants the impression that treated nets had become ineffective (17-21). Net cleanliness was also a factor in some cases(22). Fourteen studies had findings categorised under this sub-theme (23-29).

*"This net [an ITN] is more or less similar to an ordinary mosquito net because we found a mosquito with it even after hanging before sleeping" (17).*

*"If the area is fumigated even once a month by the government, then we will be free day and night from mosquito bite and not only in night" (28).*



270 *"Because of cleanliness, some husbands do not like dirty bed nets. They want nets to be washed*  
271 *every few days. So, if he gets home and finds that the bed net has not been washed, he will put*  
272 *it away. This may result in the family or couples sleeping without a bed net" (22).*

273

274 Discomfort

275 In nine studies, discomfort was presented as a reason for non-use, including the feeling of  
276 suffocation while sleeping under the nets, especially in a hot climate, or the fear of experiencing  
277 some reaction, such as skin irritation (26, 28, 30-35).

278

279 *"There's many insecticides. Sometimes it's too strong and difficult to sleep under the net*  
280 *for the first time. The insecticide prevents me from breathing well and it's very difficult to*  
281 *breathe around this product" (34).*

282

283 *"I heard that one man slept inside the net and vomited blood," and I heard that it causes*  
284 *skin irritation because the chemical is too much" (32).*

285

286 *"I am still afraid of malaria, but I could not sleep. It was too hot to sleep under the nets in*  
287 *the summer" (31).*

288

289 Seasonality of Mosquitoes

290 Reported in three studies, many participants felt that using nets during seasons when mosquitoes  
291 were less frequent, such as hot seasons, was unnecessary. At the same time, net use was more  
292 prevalent during rainy seasons when mosquitoes were perceived to be predominant (30, 34, 36):

293

294 *"We were given these nets during the rainy season when there were a lot of mosquitoes. I hung*  
295 *the nets, and the children slept in them that time. When the rainy season was over, we removed*  
296 *the nets because during that time, there was no mosquitoes" (36).*

297

298 Prioritising nets

299 In four studies, certain family members, such as infants, children under five, and pregnant women,  
300 were given priority access to available nets, with youth and older adults generally receiving less  
301 attention and prioritisation. The reason for prioritising mosquito nets could be associated with a  
302 lack of insecticide-treated nets in homes (22, 32, 37). In one study, the head of the house was  
303 prioritized over other family members(38).

304

305 *"I would not give priority to the youth because they are strong and their bodies can resist malaria...*  
306 *I would only consider those that are more vulnerable and leave those that are strong enough to*  
307 *fight" (38).*

308

309 *"We had in mind that the man, as the head of the family, should be the one to get it first; [he] has*  
310 *to sleep on the bed. If God provides more, then I and the kids shall get later" (38).*

311

312 Alternate net use

313 In six studies, alternate uses of mosquito nets such as covering farm animals, farm produce,  
314 processing milk from butter, catching fish, or rearing chickens were reported as a reason for not  
315 sleeping in them (19, 23, 35, 39-41)

316

317 *"The one I had following the distribution, frankly speaking, I didn't sleep in it because it was hard.*  
318 *So, I used it for my windows. I fixed them at the back of my windows and even my trap door. That*  
319 *is what I used. I have used it as a net for all my windows so that mosquitoes do not enter my*  
320 *room" (35).*

321  
322 *"We are in fear that what will happen in the future if we tell you everything... We use bed nets to*  
323 *cover the toilet, separating seeds from the stem; after thoroughly washing, we use them for*  
324 *filtering kinetic, coffee and milk during the separation process of milk from the butter. Those who*  
325 *cannot purchase clothes can use them as night clothes, as bed sheets, and it gives many more*  
326 *purposes" (19).*

327  
328 Socio-cultural beliefs and practices  
329 Social norms and practices can negatively influence the use of mosquito nets as highlighted in  
330 four studies. Outdoor nocturnal activities can make net use impractical and, in two studies,  
331 individuals at a funeral were reportedly not allowed a mosquito net to sleep in as it was considered  
332 taboo or seen as disrespectful to the deceased and family (14, 25, 42, 43):

333  
334 *"We don't sleep under the net when it's burial time... You cannot decide to put your net, who are*  
335 *you? How important are you? How arrogant are you? So, most of us in Teso don't even sleep*  
336 *when at a funeral. We sit out around the fire or even within a house, and in big numbers, so one*  
337 *cannot use a mosquito net" (25).*

338  
339 Net factors  
340 This theme refers to reasons for non-use that relate to the physical properties of mosquito nets.  
341 Findings from 11 studies pertained to net factors, across two sub-themes.

342  
343 Net preference  
344 Seven studies reported that participants preference for certain characteristics of nets such as  
345 color, texture and size, influences net use (22, 26, 32, 35, 37, 40, 44). In two other studies,  
346 participants expressed how some features of the nets made them better suited for other domestic  
347 use, such as hanging over doors and windows or covering of livestock and farm produce (26, 35):

348  
349 *"I have not yet installed the new net; it is still stored in its packaging with clothing. I do not like it*  
350 *because it has large meshes; I still use the old ones because they are smaller. In addition, the*  
351 *product on the new net gives the cold. The fabric is stiff and uncomfortable, my hair hangs in*  
352 *there"(37).*

353  
354 *"I got a carpenter to fix the ITN over my bed, but he said it was too big and advised that I use it*  
355 *on my doors and windows. So he cut and fixed the net on my doors and windows. I also see*  
356 *people [using] the ITN as [a] fence around their farms and gardens to protect from chickens and*  
357 *some insects" (26).*

358  
359 Net setup  
360 In four studies, participants had difficulties with the initial or ongoing setup of the mosquito nets,  
361 which impacted on the use, including difficulty in getting into the nets (20, 27, 31, 35):

362  
363 *"Once they fix the net and find entering the net uncomfortable, they will not sleep in it again*  
364 *because it did not serve their purpose. In the night, if they want to go and urinate and the net ties*  
365 *them up and they have to remove it, go out and come back to fix it, they feel like they are in prison*  
366 *and will not sleep under it."(35).*

367  
368 Environmental/lifestyle factors  
369 This theme refers to factors in the immediate environment or participants' lifestyle that contributed  
370 towards net non-use among study participants. Findings from seven studies pertained to  
371 environmental/lifestyle factors, across two sub-themes.

372  
373  
374  
375  
376  
377  
378  
379  
380  
381  
382  
383  
384  
385  
386  
387  
388  
389  
390  
391  
392  
393  
394  
395  
396  
397  
398  
399  
400  
401  
402  
403  
404  
405  
406  
407  
408  
409  
410  
411  
412  
413  
414  
415  
416  
417  
418  
419  
420  
421  
422

### Travel or nocturnal activity

As reported in five studies, mosquito net use away from one's primary residence can be challenging, particularly for individuals active at night or who frequently travel for businesses or social engagements. As a result, participants in such situations find it difficult to use bed nets and are often at risk for malaria (14, 22, 25, 40, 42):

*"Sometimes when we go farming in the valleys [protection from mosquitoes is not possible]. You might go with the intention of coming back but find that it gets dark, and so you decide to sleep there"(42).*

*"Sometimes we travel, and some homes that host us may have no bed nets, so when you stay for some days in these home,s you are likely to get malaria"(22).*

### Architecture of homes

In two studies, the structures and style of homes/houses played an important role in determining participants continuous use of mosquito nets. Participants living in houses built on stilts, for example were unable to use mosquito nets properly due to the gaps in the floorboards that allow mosquitoes to enter, regardless of the number of nets distributed to them (27, 45):

*"Because our houses are built with wood on stilts, there is space between the planks. Even if the bed net is well tied to the ceiling, there is always a space beneath the planks that mosquito harnesses to get in. But I don't think there is a way to avoid mosquitoes unless we change our houses. That would require a lot of money. The best way to help us is to change our houses" (42).*

### Administrative/Economic Factors

This theme refers to a participant's ability to access or purchase mosquito nets. Findings from nine studies pertained to administrative/economic factors, across two sub-themes.

#### Accessing nets

Five studies highlighted participants dependence on free net distribution, especially in health facilities, with reports of bias in such distributions resulting in adequate numbers of nets available within the household (11, 17, 24, 46, 47).

*"It is segregation, favouritism, and all kind of things. For example, if they received 40 Bednets, doctors give them to 5-6 people who did not visit the health centre. If we get there, they said that is it finished" (48).*

*"These days, people get bed nets at the health centre from antenatal consultation or child vaccination at nine months. However, those who don't attend consultation or vaccination services have a problem with getting bed nets" (24).*

#### Economic implications

Participants in four studies who could not obtain nets via free or subsidised distribution campaigns either had to raise money to procure new nets, or stay without them (22, 36, 45, 49).

*"ITNs are sold at the health facility at a lower price. If you don't go early, you might not get [sic] it to buy because a lot of people go there to get them. If you miss this, then you have to buy it from the open market at a relatively higher price. So, if you don't have the money, you cannot get the net to use" (49).*

423 *Nets received via free distribution campaigns were exchanged for money in some cases. One*  
424 *reason given for such gestures was poverty (36, 45).*

425  
426 *“We ensure free bed net distribution to pregnant women and young children, but the issue is that*  
427 *many of these women sell their nets” (45).*

## 428 429 **DISCUSSION**

430  
431 In this review, we sought to assess the extent and quality of qualitative research published  
432 between 2011 and 2021 pertaining to the non-use of all types of mosquito nets and, drawing on  
433 the findings from this literature, update current understanding of reasons for mosquito net non-  
434 use in MEC. The focus on qualitative research was informed by an earlier review published in  
435 2011 which identified a dearth of qualitative investigation on this topic. Our review identified  
436 substantial growth in qualitative research on the topic of mosquito net non-use with 39 qualitative  
437 or mixed methods studies published between 2011 and 2021 as compared to four between 1999  
438 and 2010 (12). Significantly, this growth in qualitative research was primarily driven by  
439 researchers working at institutions located in MEC.

440  
441 Not only did we find growth in published, qualitative research output, but our findings also indicate  
442 the increased research output was of a generally high standard. A CASP score of at least eight  
443 out of ten, indicative of high quality, was awarded to more than 90% of the reviewed publications.  
444 As MEC-based researchers primarily drove the growth in qualitative research publication, this  
445 finding is especially pleasing concerning research capacity and equity issues in global health  
446 research (50). Nevertheless, two-thirds of the reviewed papers [28/39] were rated poorly on the  
447 CASP measure of reflexivity [Table 4], suggesting this may be an aspect that needs greater  
448 attention when preparing qualitative research for publication, potentially through effective  
449 strategies such as reflexive writing or collaborative reflection (51).

450  
451 With regards to updating current understanding of reasons for mosquito net non-use in MEC, our  
452 study re-affirms many of the findings presented in the original review by Pulford et al. (12). The  
453 two most frequently cited reasons for mosquito net non-use determined by Pulford et al:  
454 discomfort due to heat and perceived low mosquito density were also prominent in many of the  
455 qualitative studies included in our review. The continued reporting of these factors over an  
456 extended period via quantitative, and now a more significant number of qualitative studies,  
457 strongly suggests that they are persistent and common barriers to mosquito net use. However,  
458 our findings also extend upon those presented in the original Pulford et al. review, primarily  
459 through the identification of four overarching factors that contribute towards net non-use; namely,  
460 human factors, net factors, environmental/lifestyle factors and administrative/economic factors.  
461 The human and the net factor were the two most commonly reported factors. Interventions that  
462 might address these issues include continuous education aimed at changing human behaviour  
463 and interventions aimed at designing mosquito nets that are less harmful and more user-friendly  
464 in terms of style, size, and texture.

465  
466 The present study is the first literature review that exclusively focuses on qualitative research on  
467 the reported reasons for the non-use of all forms of mosquito nets. The included papers are  
468 proven to be of high quality. Two independent researchers validated the article screening, final  
469 theme selection, and quality assessment, which we believe reduced selection bias. The synthesis  
470 findings were supported by multiple quotes from the various studies, representing a complete  
471 description of the themes, which increased trustworthiness. Despite these efforts to ensure  
472 quality, limitations remained. Only English language publications were included, and grey  
473 literature was excluded. Thus, we may have left out qualitative data related to the causes of

474 mosquito net non-use that could have increased the value of our research results. The similarity  
475 in geographical distribution and economic status of the MEC in the review enhances the  
476 transferability of findings. However, the debate over decontextualizing qualitative synthesis  
477 methods may limit the transferability of the results (52).A further review of quantitative research  
478 may be required to generalise the findings.

479

#### 480 **Conclusion**

481 Over the last decade, there has been a significant increase in high-quality qualitative research,  
482 contributing to a consolidated and more in-depth understanding of the reasons for mosquito net  
483 non-use. The review findings highlight the wide range of factors that influence net use. Yet, some  
484 factors have been consistently reported at high frequency over an extended time period indicating  
485 these are priority concerns to address. The research focus should shift toward intervention studies  
486 to address these issues.

487

#### 488 Acknowledgments:

489 The Mamco Selab scholarship at the Liverpool School of Tropical Medicine for part tuition fee in  
490 support of a Masters's degree programme for which this literature review was completed.

491

#### 492 Contributors:

493 HL, and JP were involved in designing the review. HL was the lead researcher, actively engaged  
494 in searching, screening, quality assessment, and data analysis. JP conceptualised the study. US  
495 participated in the screening and quality assessment of the relevant papers.

496

#### 497 Competing interests:

498 None declared.

499

#### 500 Patient consent for publication:

501 Not required

502

#### 503 Data sharing statement:

504 All data will be made available upon request

505

506

#### 507 Supporting information :

508

509 S5 Table: Summary of study's characteristics.

510 S6 Table: Lead Authors Institution of affiliation.

511 S7 Table: Characteristics of included studies.

512 S8 Table: Result of synthesis.

513

## References

1. White NJ, Pukrittayakamee S, Hien TT, Faiz MA, Mokuolu OA, Dondorp AM. Malaria. *Lancet*. 2014;383(9918):723-35.
2. Centers for Disease Control and Prevention. Malaria. CDC. 2021.
3. World Health Organization. WHO Guidelines for malaria. 2022.
4. World Health Organization. Guidelines for malaria vector control. 2019.
5. Mwangi TW, Ross A, Marsh K, Snow RW. The effects of untreated bednets on malaria infection and morbidity on the Kenyan coast. *Trans R Soc Trop Med Hyg*. 2003;97(4):369-72.
6. Vijayasekar.R, Karthick. T, Karthikeyan.S, Kota Vinesh Kumar Reddy. Mosquito Net Properties and Applications. *International Research Journal of Engineering and Technology[IRJET]*. 2020;07(07 July 2020).
7. Cuervo-Parra JA, Cortés TR, Ramirez-Lepe M. Mosquito-borne diseases, pesticides used for mosquito control, and development of resistance to insecticides. *Insecticides resistance Rijeka: InTechOpen*. 2016:111-34.
8. Lindsay SW, Thomas MB, Kleinschmidt I. Threats to the effectiveness of insecticide-treated bednets for malaria control: thinking beyond insecticide resistance. *The Lancet Global Health*. 2021;9(9):e1325-e31.
9. Alliance for Malaria Prevention. Tracking the number and location of LLINs in malaria endemic countries Manta Ray Media: Alliance for Malaria Prevention; 2021 [cited 2022 16 August]. Available from: <https://netmappingproject.allianceformalariaprevention.com/>.
10. Scott J, Kanyangara M, Nhama A, Macete E, Moss WJ, Saute F. Factors associated with use of insecticide-treated net for malaria prevention in Manica District, Mozambique: a community-based cross-sectional survey. *Malar J*. 2021;20(1):200.
11. Hill J, Lines J, Rowland M. Insecticide-treated nets. *Advances in parasitology*. 2006;61:77-128.
12. Pulford J, Hetzel MW, Bryant M, Siba PM, Mueller I. Reported reasons for not using a mosquito net when one is available: a review of the published literature. *Malaria journal*. 2011;10(1):1-10.
13. Perkins JM, Krezanoski P, Takada S, Kakuhikire B, Batwala V, Tsai AC, et al. Social norms, misperceptions, and mosquito net use: a population-based, cross-sectional study in rural Uganda. *Malaria Journal*. 2019;18(1):189.
14. Guglielmo F, Ranson H, Sagnon Nf, Jones C. The issue is not 'compliance': exploring exposure to malaria vector bites through social dynamics in Burkina Faso. *Anthropology & medicine*. 2021;28(4):508-25.
15. Harrison JK, Reid J, Quinn TJ, Shenkin SD. Using quality assessment tools to critically appraise ageing research: a guide for clinicians. *Age Ageing*. 2017;46(3):359-65.
16. Critical Appraisal Skills Programme. CASP Qualitative Checklist. 2018.
17. Fouzia K, Hossain MB, Chowdhury TR, Rahman MS, Moktadir K, Shamsun N, et al. Exploring the gap between coverage, access, and utilization of long-lasting insecticide-treated nets (LLINs) among the households of malaria endemic districts in Bangladesh. *Malaria Journal*. 2018;17(455):(6 December 2018).
18. Asmamaw M, Mulugeta A, Gari SR, Helmut K, Kassahun A. Barriers of persistent long-lasting insecticidal nets utilization in villages around Lake Tana, Northwest Ethiopia: a qualitative study. *BMC Public Health*. 2019;19(1303):(16 October 2019).
19. Zerdo Z, Van Geertruyden J-P, Massebo F, Biresaw G, Shewangizawu M, Tunje A, et al. Parents' perception on cause of malaria and their malaria prevention experience among school-aged children in Kutcha district, Southern Ethiopia; qualitative study. *PloS one*. 2020;15(10):e0239728.

20. Galvin KT, Pettford N, Ajose F, Davies D. An exploratory qualitative study on perceptions about mosquito bed nets in the Niger Delta: what are the barriers to sustained use? *Journal of multidisciplinary healthcare*. 2011;4:73-83.
21. Bauch JA, Gu JJ, Msellem M, Mårtensson A, Ali AS, Gosling R, et al. Perception of malaria risk in a setting of reduced malaria transmission: a qualitative study in Zanzibar. *Malaria journal*. 2013;12:75.
22. Msellemu D, Shemdoe A, Makungu C, Mlacha Y, Kannady K, Dongus S, et al. The underlying reasons for very high levels of bed net use, and higher malaria infection prevalence among bed net users than non-users in the Tanzanian city of Dar es Salaam: a qualitative study. *Malaria journal*. 2017;16(1):423.
23. Aberese-Ako M, Magnussen P, Ampofo GD, Tagbor H. Health system, socio-cultural, economic, environmental and individual factors influencing bed net use in the prevention of malaria in pregnancy in two Ghanaian regions. *Malaria Journal*. 2019;18(363).
24. Asingizwe D, Poortvliet PM, Koenraad CJ, Van Vliet AJ, Ingabire CM, Mutesa L, et al. Role of individual perceptions in the consistent use of malaria preventive measures: mixed methods evidence from rural Rwanda. *Malaria Journal*. 2019;18(1):1-19.
25. Ekusai-Sebatta D, Arinaitwe E, Mpimbaza A, Nankabirwa JI, Drakeley C, Rosenthal PJ, et al. Challenges and opportunities for use of long-lasting insecticidal nets to prevent malaria during overnight travel in Uganda: a qualitative study. *Malaria Journal*. 2021;20(283).
26. Esienmoh E, Mboho M, Ndiok A. Use of insecticide-treated nets by pregnant and childbearing-age women: action research in Southern Nigeria. *African Journal of Midwifery and Women's Health*. 2016;10(1):19-26.
27. Danhouno G, Wiktorowicz ME, Premji SS, Nasiri K. Determinants of bed net policy implementation: A case study of Southern Benin. *The International journal of health planning and management*. 2018;33(1):e279-e92.
28. Asuquo EF, Edet OB, Sampson-Akpan PE, Duke E, Nsemo AD, Ajah CI. Utilization of insecticide treated nets among pregnant women and mothers with under five children in Ikot Omin Community, Calabar, Nigeria. *Global Journal of Pure and Applied Sciences*. 2017;23(1):167-75.
29. Pulford J, Oakiva T, Angwin A, Bryant M, Mueller I, Hetzel MW. Indifferent to disease: A qualitative investigation of the reasons why some Papua New Guineans who own mosquito nets choose not to use them. *Social Science & Medicine*. 2012;75(12):2283-90.
30. Jaeger MS, Briët OJT, Keating J, Ahorlu CK, Yukich JO, Oppong S, et al. Perceptions on the effect of small electric fans on comfort inside bed nets in southern Ghana: a qualitative study. *Malaria Journal*. 2016;15(580):(1 December 2016).
31. Pooseesod K, Parker DM, Meemon N, Lawpoolsri S, Singhasivanon P, Sattabongkot J, et al. Ownership and utilization of bed nets and reasons for use or non-use of bed nets among community members at risk of malaria along the Thai-Myanmar border. *Malaria Journal*. 2021;20(305).
32. Onyeneho NG. Sleeping under insecticide-treated nets to prevent malaria in Nigeria: what do we know? *Journal of Health, Population & Nutrition*. 2013;31(2):243-51.
33. Nnko SE, Whyte SR, Geissler WP, Aagaard-Hansen J. Scepticism towards insecticide treated mosquito nets for malaria control in rural community in north-western Tanzania. *Tanzania journal of health research*. 2012;14(2):96-103.
34. Berthe S, Loll D, Faye SL, Wone I, Koenker H, Arnold B, et al. "When I sleep under the net, nothing bothers me; I sleep well and I'm happy": Senegal's culture of net use and how inconveniences to net use do not translate to net abandonment. *Malaria Journal*. 2014;13(1):1-8.
35. Ahorlu CS, Adongo P, Koenker H, Zigirumugabe S, Sika-Bright S, Koka E, et al. Understanding the gap between access and use: a qualitative study on barriers and facilitators to insecticide-treated net use in Ghana. *Malaria journal*. 2019;18(1):1-13.

36. Strachan CE, Nuwa A, Muhangi D, Okui AP, Helinski ME, Tibenderana JK. What drives the consistent use of long-lasting insecticidal nets over time? A multi-method qualitative study in mid-western Uganda. *Malaria journal*. 2016;15(1):1-12.
37. Mattern C, Pourette D, Raboanary E, Kesteman T, Piola P, Randrianarivelosia M, et al. "Tazomoka is not a problem". Local perspectives on malaria, fever case management and bed net use in Madagascar. *PLoS ONE*. 2016;11(3):e0151068.
38. Lam Y, Harvey SA, Monroe A, Muhangi D, Loll D, Kabali AT, et al. Decision-making on intra-household allocation of bed nets in Uganda: do households prioritize the most vulnerable members? *Malaria journal*. 2014;13:183.
39. Birhanu Z, Abebe L, Sudhakar M, Dissanayake G, Yihdego Y, Alemayehu G, et al. Access to and use gaps of insecticide-treated nets among communities in Jimma Zone, southwestern Ethiopia: baseline results from malaria education interventions. *BMC Public Health*. 2015;15(1):1-11.
40. Nyunt MH, Aye KM, Kyaw MP, Kyaw TT, Hlaing T, Oo K, et al. Challenges in universal coverage and utilization of insecticide-treated bed nets in migrant plantation workers in Myanmar. *Malaria journal*. 2014;13:211.
41. Taremwia IM, Ashaba S, Adrama HO, Ayebazibwe C, Omoding D, Kemeza I, et al. Knowledge, attitude and behaviour towards the use of insecticide treated mosquito nets among pregnant women and children in rural Southwestern Uganda. *BMC Public Health*. 2017;17(794):(10 October 2017).
42. Dunn CE, Le Mare A, Makungu C. Malaria risk behaviours, socio-cultural practices and rural livelihoods in southern Tanzania: Implications for bednet usage. *Social Science & Medicine*. 2011;72(3):408-17.
43. Monroe A, Harvey SA, Lam Y, Muhangi D, Loll D, Kabali AT, et al. "People will say that I am proud": a qualitative study of barriers to bed net use away from home in four Ugandan districts. *Malaria journal*. 2014;13(1):1-8.
44. Sande S, Jagals P, Mupeta B, Chadambuka A. An investigation of the use of rectangular insecticide-treated nets for malaria control in Chipinge District, Zimbabwe: a descriptive study. *Pan African Medical Journal*. 2012;13:5.
45. Brooks HM, Jean Paul MK, Claude KM, Mocanu V, Hawkes MT. Use and disuse of malaria bed nets in an internally displaced persons camp in the Democratic Republic of the Congo: A mixed-methods study. *PloS one*. 2017;12(9):e0185290.
46. Shwe Yi L, Thae Maung M, Tripathy JP, Shewade HD, Swai Mon O, Zaw L, et al. Barriers in distribution, ownership and utilization of insecticide-treated mosquito nets among migrant population in Myanmar, 2016: a mixed methods study. *Malaria Journal*. 2019;18(172):(14 May 2019).
47. Yirsaw AN, Gebremariam RB, Getnet WA, Mihret MS. Insecticide-treated net utilization and associated factors among pregnant women and under-five children in east Belessa district, Northwest Ethiopia: using the health belief model. *Malaria Journal*. 2021;20(130).
48. Hill J, Kayentao K, Achieng F, Diarra S, Dellicour S, Diawara SI, et al. Access and use of interventions to prevent and treat malaria among pregnant women in Kenya and Mali: a qualitative study. *PloS one*. 2015;10(3):e0119848.
49. Manu G, Boamah-Kaali EA, Febir LG, Ayipah E, Owusu-Agyei S, Asante KP. Low utilization of insecticide-treated bed net among pregnant women in the middle belt of Ghana. *Malaria research and treatment*. 2017;2017.
50. Beaudry C, Mouton J, Prozesky H. *The Next Generation of Scientists in Africa*. C. Beaudry JM, H.Prozesky, editor. Cape town, South Africa: African Minds; 2018.
51. Olmos-Vega FM, Stalmeijer RE, Varpio L, Kahlke R. A practical guide to reflexivity in qualitative research: AMEE Guide No. 149. *Medical Teacher*. 2022;1-11.
52. Leung L. Validity, reliability, and generalizability in qualitative research. *J Family Med Prim Care*. 2015;4(3):324-7.





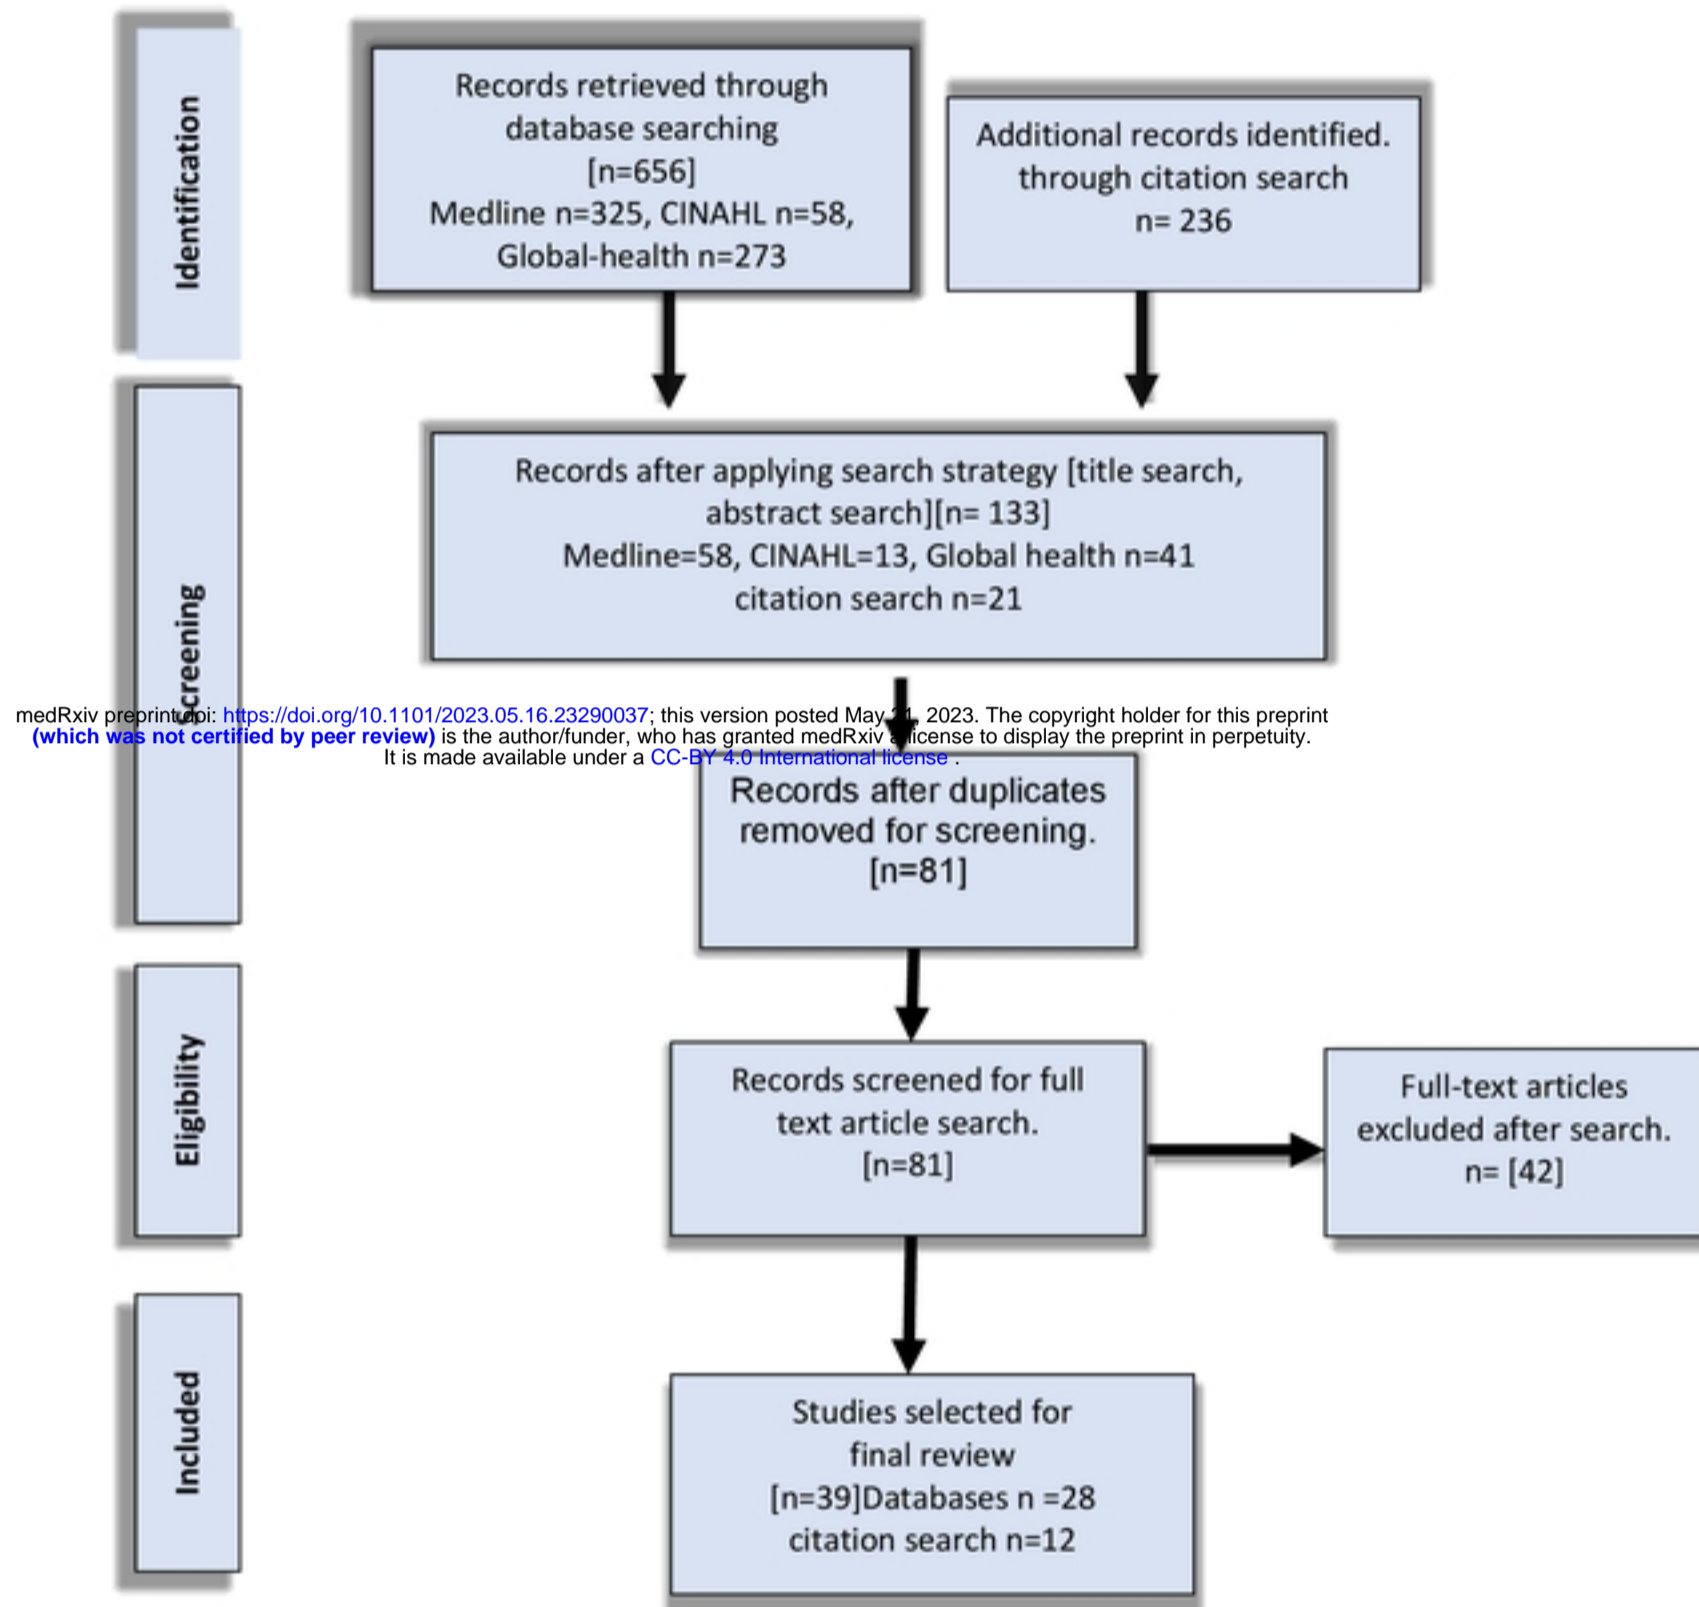

Figure1: PRISMA flowchart showing the process of searching and selecting the relevant studies.
